# Supplementary material for: Electrospun amino-functionalized PDMS as a novel SPME sorbent for the speciation of inorganic and organometallic arsenic species
Source: Royal Society of Chemistry journal article supplement (doi:10.1039/c3ra43622e), 2013-01-01
Supplement: c3ra43622e.pdf [file c3ra43622e.pdf]

## Supporting Information

### Electrospun Amino-Functionalized PDMS as a Novel SPME Sorbent for the Speciation of Inorganic and Organometallic Arsenic Species

Ezel Boyacı,<sup>‡</sup> Nesrin Horzum,<sup>‡</sup> Ali Çağır, Mustafa M. Demir,<sup>§\*</sup> Ahmet E. Eroğlu\*

**Table S1.** Operation conditions for HPLC-ICPMS

|                          |                                                                                        |                     |                          |
|--------------------------|----------------------------------------------------------------------------------------|---------------------|--------------------------|
| HPLC                     |                                                                                        | Agilent 1200        |                          |
| Analytical column        | PRP-X100 (250 mm x 4.1 mm, 10 $\mu$ m)                                                 |                     |                          |
| Mobile phase             | 10.0 mM and 30.0 mM (NH <sub>4</sub> ) <sub>2</sub> CO <sub>3</sub> solutions, pH=8.50 |                     |                          |
| Flow rate                | 1.0 mL min <sup>-1</sup>                                                               |                     |                          |
| Column temperature       | 25 °C                                                                                  |                     |                          |
| Sample loop              | 100 $\mu$ L                                                                            |                     |                          |
| ICP-MS                   |                                                                                        | Agilent 7500ce      |                          |
| Rf power output          | 1550 W                                                                                 | Interface           | Ni sampler cone (1 mm)   |
| Frequency                | 27 MHz                                                                                 |                     | Ni skimmer cone (0.4 mm) |
| Plasma gas flow rate     | 15 Lmin <sup>-1</sup>                                                                  | Spray chamber temp. | 2 °C                     |
| Carrier gas flow rate    | 0.85 Lmin <sup>-1</sup>                                                                | Nebulizer           | Concentric               |
| Collision gas flow rate  | 4.5 mLmin <sup>-1</sup>                                                                | Dwell time          | 100 ms                   |
| Octopole reaction system | +                                                                                      | Detected isotope    | <sup>75</sup> As         |
| Collision gas            | He                                                                                     | Integration mode    | Peak area                |

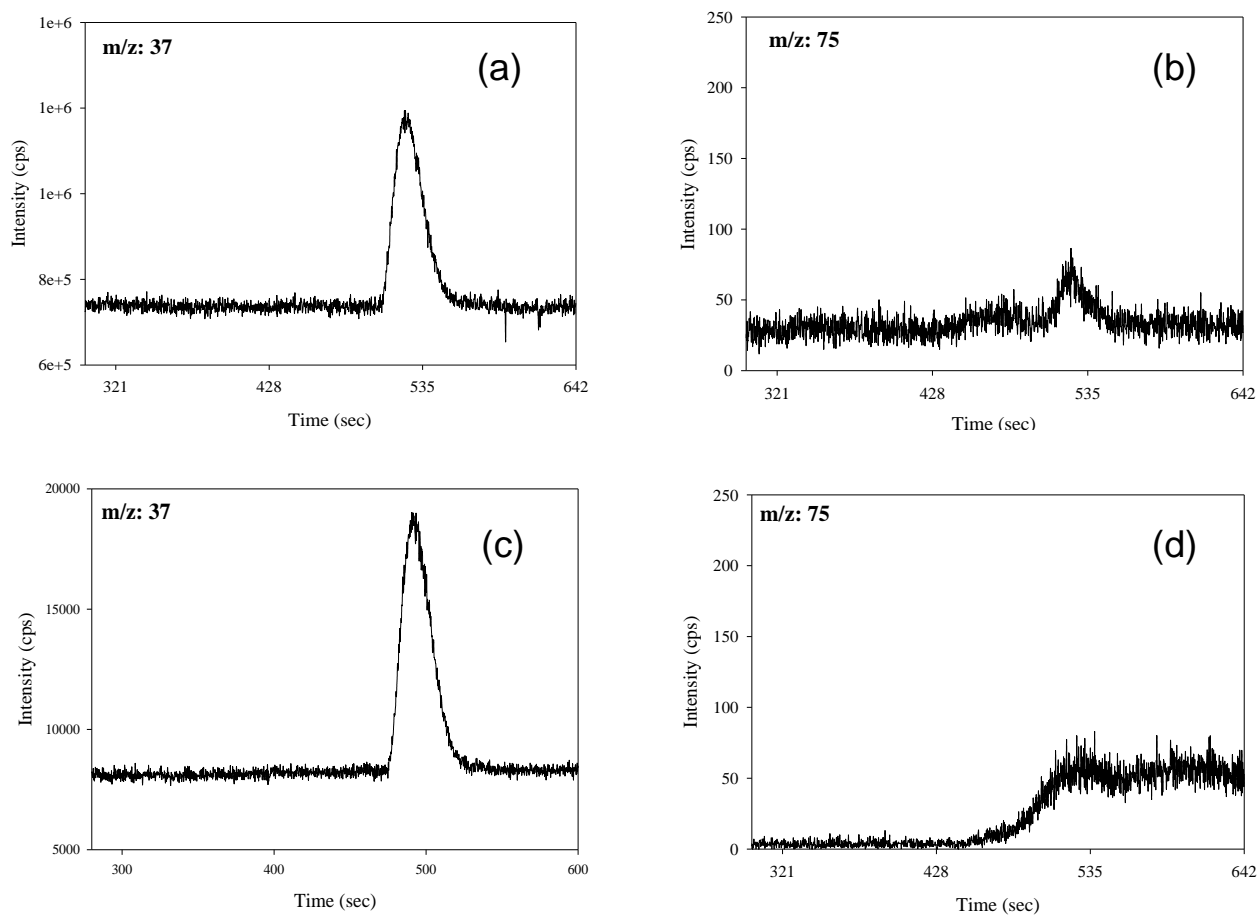

**Figure S1.** Chromatograms obtained after injection of 0.010 M NaCl to HPLC-ICPMS. (a) and (b) no He in the octopole collision cell, (c) and (d) in the presence of He in the octopole collision cell.

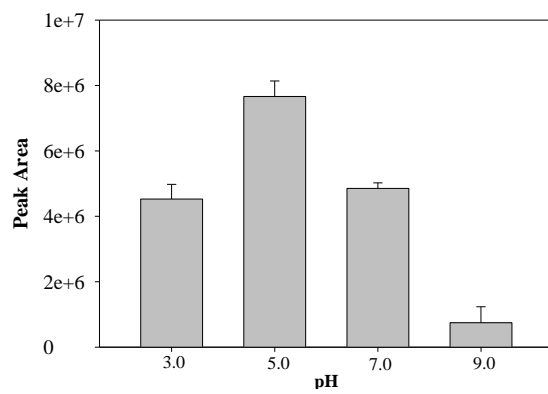

As(V)

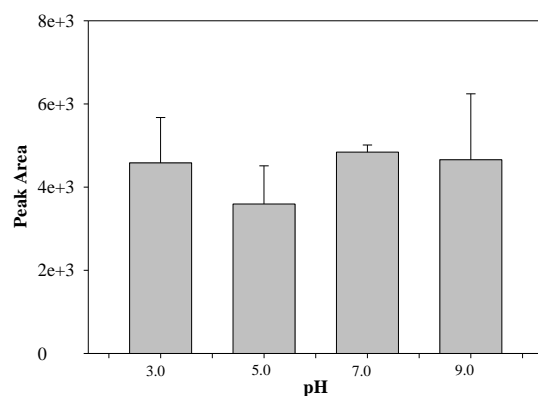

DMA

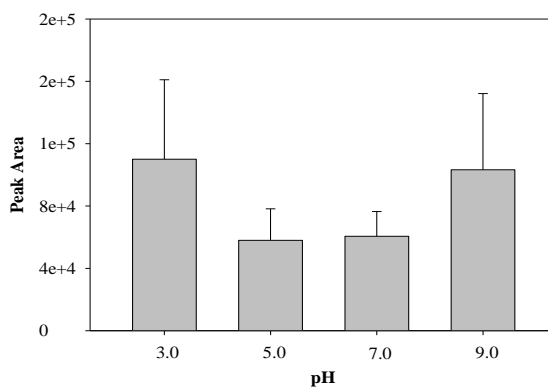

MMA

**Figure S2.** Effect of solution pH on extraction of arsenic species (Extraction conditions; arsenic concentration:  $10.0 \mu\text{g L}^{-1}$ , solution volume:  $15.0 \text{ mL}$ , stirring speed:  $700 \text{ rpm}$ , extraction time:  $60 \text{ min}$ , temperature:  $25 \text{ }^\circ\text{C}$ . Desorption conditions; desorption solution:  $150 \mu\text{L}$   $50.0 \text{ mM KH}_2\text{PO}_4$ , desorption time  $20 \text{ min}$ )

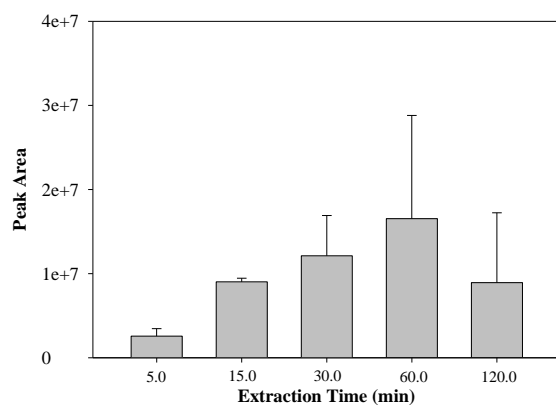

As(V)

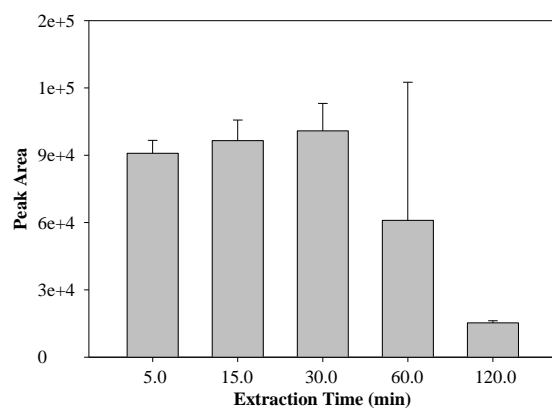

DMA

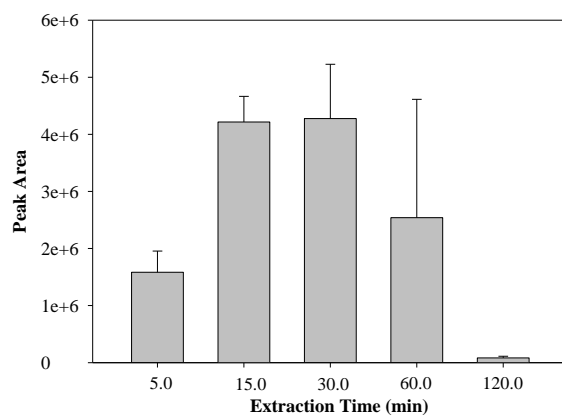

MMA

**Figure S3.** Effect of agitation time on extraction of arsenic species (Extraction conditions: arsenic concentration:  $10.0 \mu\text{g L}^{-1}$ , solution pH: 5.0, solution volume: 15 mL, stirring speed: 700 rpm. Desorption conditions; desorption solution:  $150 \mu\text{L}$  50.0 mM  $\text{KH}_2\text{PO}_4$ , desorption time: 20 min)

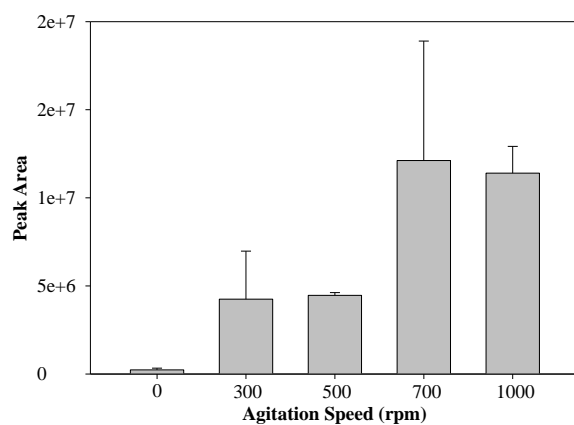

As(V)

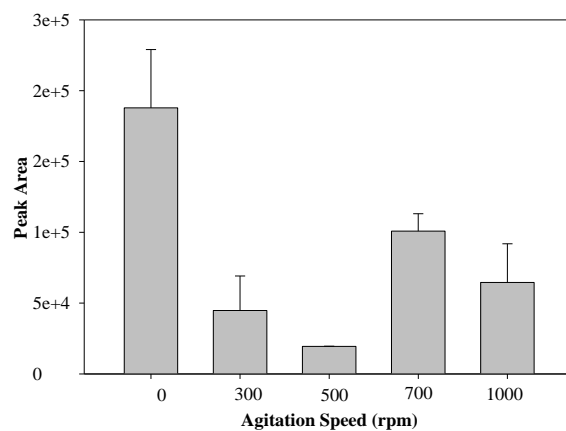

DMA

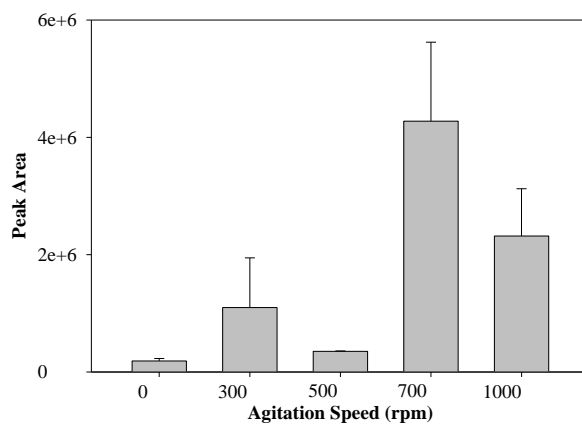

MMA

**Figure S4.** Effect of agitation speed on extraction of arsenic species (Extraction conditions; extraction time: 30 min, arsenic concentration:  $10.0 \mu\text{g L}^{-1}$ , solution pH: 5.0, solution volume: 15 mL. Desorption conditions; desorption solution:  $150 \mu\text{L}$  50.0 mM  $\text{KH}_2\text{PO}_4$ , desorption time: 20 min)

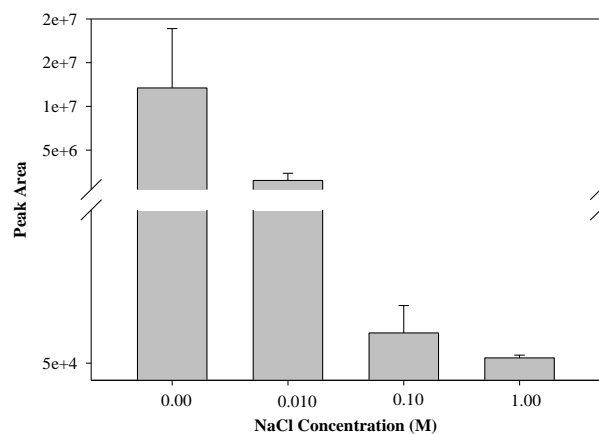

As(V)

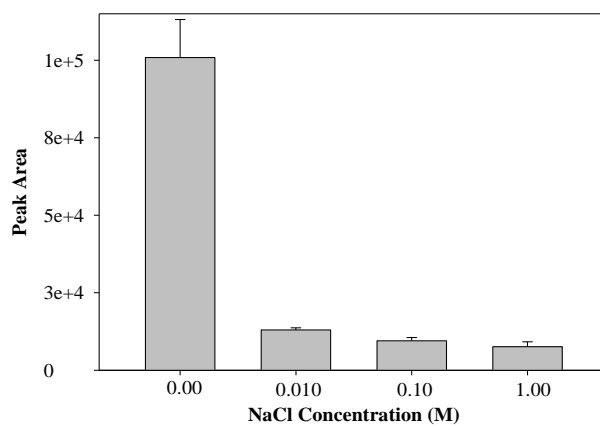

DMA

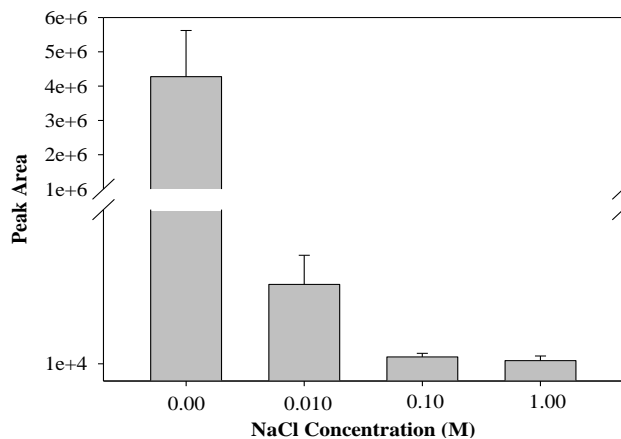

MMA

**Figure S5.** Effect of NaCl concentration on extraction of arsenic species (Extraction conditions; extraction time: 30 min, arsenic concentration: 10.0  $\mu\text{g L}^{-1}$ , solution pH: 5.0, stirring speed: 700 rpm, solution volume: 15 mL. Desorption conditions; desorption solution: 150  $\mu\text{L}$  50.0 mM  $\text{KH}_2\text{PO}_4$ , desorption time: 20 min)

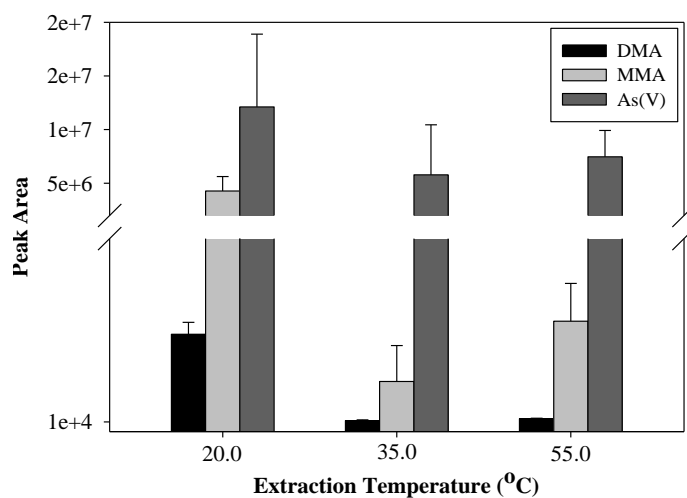

**Figure S6.** Effect of solution temperature on extraction of the arsenic species. (Extraction conditions; extraction time: 30 min, arsenic concentration:  $10.0 \mu\text{g L}^{-1}$ , solution pH: 5.0, stirring speed: 700 rpm, solution volume: 15 mL. Desorption conditions; desorption solution:  $150 \mu\text{L}$  50.0 mM  $\text{KH}_2\text{PO}_4$ , desorption time: 20 min)
